# Supplementary material for: Deep eutectic solvent-assisted bacterial devulcanization, detoxification, and degradation of waste tyre rubber
Source: Royal Society of Chemistry journal article supplement (doi:10.1039/d6ra01664b), 2026-05-18
Supplement: d6ra01664b1.pdf [file d6ra01664b1.pdf]

## **Deep eutectic solvent-assisted bacterial devulcanization, detoxification, and degradation of waste tyre rubber**

Pritish R. Shukla,<sup>a</sup> Utpal Roy,<sup>a\*</sup> and Sunil Bhand<sup>b</sup>

\*uroy@goa.bits-pilani.ac.in

<sup>a</sup>Department of Biological Sciences, Birla Institute of Technology and Science- Pilani, K.K. Birla Goa Campus, NH17B, Bypass Road, Zuarinagar, Goa, 403726, India.

<sup>b</sup>Department of Chemistry, Birla Institute of Technology and Science- Pilani, K.K. Birla Goa Campus, NH17B, Bypass Road, Zuarinagar, Goa, 403726, India.

### **Supplementary Information**

#### **Table of Contents**

#### **1. Supplementary tables**

#### **2. Supplementary figures**

## Supplementary tables

**Table S1.** CHNS analysis of treated GTR

| Name                                                      | C (%) | S (%) | % C utilization | % S removal |
|-----------------------------------------------------------|-------|-------|-----------------|-------------|
| <b>GTR</b>                                                | 88.66 | 2.34  | -               | -           |
| <b>DES-treated GTR</b>                                    | 84.90 | 1.94  | 4.24            | 17.09       |
| <b><i>R. rhodochrous</i>-treated GTR</b>                  | 83.18 | 1.95  | 6.18            | 16.87       |
| <b>DES pretreated + <i>R. rhodochrous</i>-treated GTR</b> | 77.51 | 1.84  | 12.57           | 21.52       |

**Table S2.** Weight reduction measurement of GTR obtained from cultures of *R. rhodochrous* RPK1 and a combination of ChCl/Urea DES and *R. rhodochrous* in MSM medium after 28 days of incubation

| Culture                                                 | Initial weight (g) | Final weight (g) | Weight loss (%) |
|---------------------------------------------------------|--------------------|------------------|-----------------|
| <b>MSM + GTR</b>                                        | 1.00               | 0.967            | 3.30 ± 2.36     |
| <b>(Abiotic Control)</b>                                |                    |                  |                 |
| <b>MSM + <i>R. rhodochrous</i> + GTR</b>                | 1.00               | 0.951            | 4.93 ± 1.15     |
| <b>MSM + <i>R. rhodochrous</i> + DES pretreated-GTR</b> | 1.00               | 0.841            | 15.84 ± 8.78    |

**Table S3.** Mass distribution identification of oligo-isoprenoids produced by enzymatic cleavage of polyisomeric chains of *R. rhodochrous*-treated GTR and ChCl/Ur DES-pretreated+*R. rhodochrous*-treated GTR by LC-MS.

| Number of isoprene units (n) | Structural Formula                              | $m/z$ | $m/z$ [M+Na] <sup>+</sup> | $m/z$ [M+Na+CH <sub>3</sub> OH] <sup>+</sup> | $m/z$ [M+P] | Retention time (min) |
|------------------------------|-------------------------------------------------|-------|---------------------------|----------------------------------------------|-------------|----------------------|
| 2                            | C <sub>20</sub> H <sub>32</sub> O <sub>2</sub>  | -     | 307                       | -                                            | -           | 12.172               |
| 3                            | C <sub>25</sub> H <sub>40</sub> O <sub>2</sub>  | -     | -                         | 427                                          | -           | 9.453                |
| 4                            | C <sub>30</sub> H <sub>48</sub> O <sub>2</sub>  | -     | -                         | 494                                          | -           | 10.419               |
| 5                            | C <sub>35</sub> H <sub>56</sub> O <sub>2</sub>  | -     | -                         | 562.9                                        | -           | 11.512               |
| 8                            | C <sub>50</sub> H <sub>80</sub> O <sub>2</sub>  | -     | -                         | -                                            | 740.1       | 8.590                |
| 10                           | C <sub>60</sub> H <sub>96</sub> O <sub>2</sub>  | -     | 872.3                     | -                                            | -           | 9.555                |
| 11                           | C <sub>65</sub> H <sub>104</sub> O <sub>2</sub> | 916   | -                         | -                                            | -           | 10.063               |

### Supplementary figures

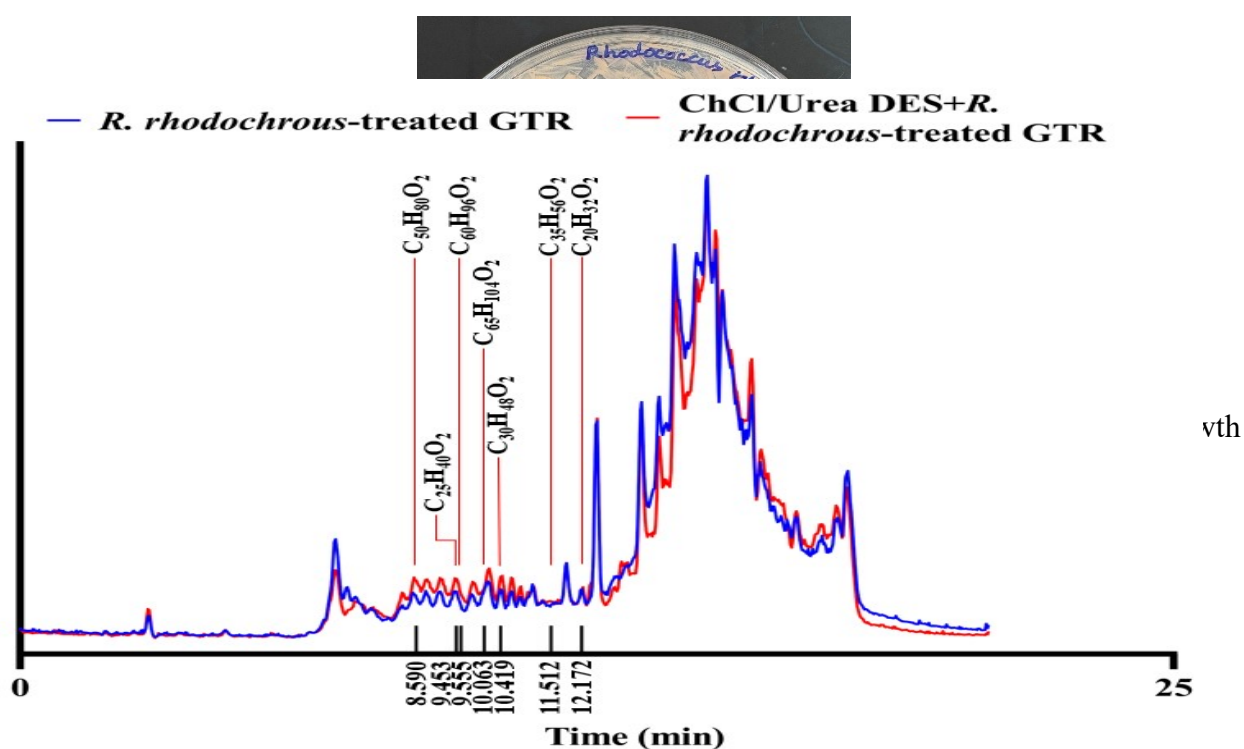

**Figure S2.** LC-MS spectra of extracted oligo-isoprenoids.
